# Supplementary material
Source: PubMed Central journal article supplement (PMC10642639)

1092 **Supplementary Figure Legends**

1093

1094 **Supplementary Figure 1. Cell-impermeable chelators effectively reduce Zn<sup>2+</sup> levels**  
1095 **in external media but do prevent initiation or continuation of Ca<sup>2+</sup> oscillations.**

1096 (A) A representative trace of FluoZin3 fluorescence in replete monitoring media (TL-HEPES). The  
1097 media was supplemented with cell-impermeable FluoZin-3, and after initiation of monitoring, the  
1098 addition of EDTA (100 μM) occurred at the designated point (triangle). (B) The left black trace  
1099 represents Ca<sup>2+</sup> oscillations initiation by injection of *mPlcζ* mRNA (0.01 μg/μl). The oscillations were  
1100 monitored in Ca<sup>2+</sup> and Mg<sup>2+</sup>-free media and in the presence of EDTA (110 μM) to chelate residual  
1101 divalent cations derived from the water source or reagents used to make the media. The right red trace  
1102 represents the initiation of oscillations as above, but after a period indicated by the black and green  
1103 bars, Ca<sup>2+</sup> and Mg<sup>2+</sup> were sequentially added back.

1104

1105 **Supplementary Figure 2. Overexpression of ER accessory protein ERp44 did not**  
1106 **change the Ca<sup>2+</sup> responses initiated by *mPlcζ* mRNA microinjection, Acetylcholine,**  
1107 **or SrCl<sub>2</sub>.**

1108 (A) Representative immunofluorescent images of MII eggs with overexpression of  
1109 ERp44. At 5 hr. post microinjection, eggs were treated with 10 or 50 μM of TPEN and  
1110 incubated for 1 hr, after which they were fixed and stained. An anti-HA antibody was  
1111 used. Scale bar: 10 μm. (B) Representative Ca<sup>2+</sup> responses induced by *mPlcζ* mRNA  
1112 microinjection (0.01 μg/ μl-left column), SrCl<sub>2</sub> (10 mM-center column), and  
1113 acetylcholine (50 μM-right column) in eggs with (top panels) or without (bottom panels)  
1114 ERp44 overexpression.

1115

1116 **Supplementary Figure 3. Elevated Zn<sup>2+</sup> impairs egg activation and the subsequent**  
1117 **embryo development.**

1118 (A) MII eggs were incubated in TL-HEPES containing 0, 0.1, or 1.0 μM ZnPT at room  
1119 temperature for 10 min and washed several times with fresh TL-HEPES and injected with  
1120 *mPlcζ* mRNA. After it, eggs and zygotes were cultured in KSOM for 24h. PN formation  
1121 and 2-cell development were checked at 7 and 24h post-microinjection. Bars represent  
1122 the percentages of injected eggs that reached the PN and the 2-cell stage. Scale bar: 50  
1123 μm. (B) MII eggs injected with *mPlcζ* mRNA were incubated in KSOM without ZnPT  
1124 for an hr. and then incubated in KSOM with 0 or 0.1 μM ZnPT for 24h. The second polar  
1125 body extrusion, PN formation, and 2-cell development were checked at 2.5-, 7- and 24h.  
1126 post-microinjection. Bars represent the percentages of injected eggs that reached the PN  
1127 and the 2-cell stage. Scale bar: 50 μm.

## Supplementary Figure 1.

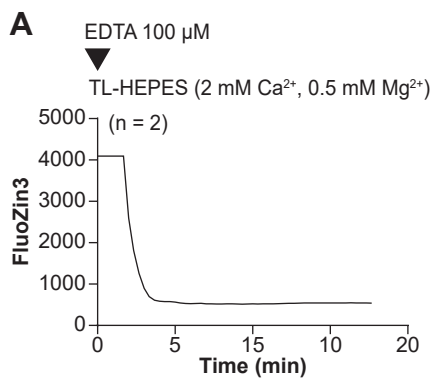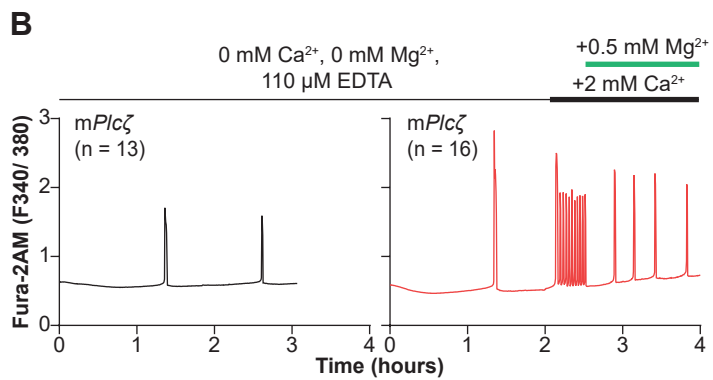

## Supplementary Figure 2.

**A**

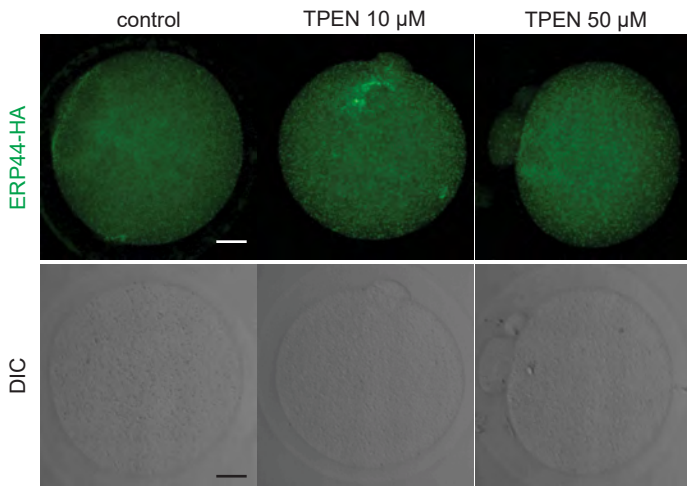

**B**

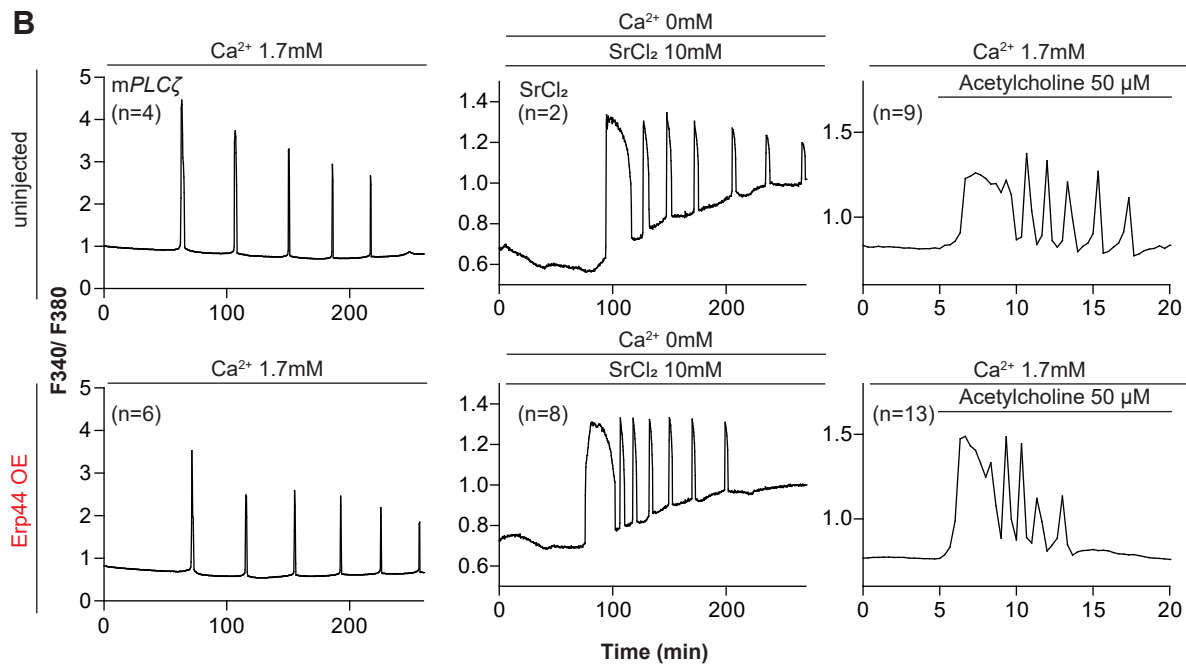

### Supplementary Figure 3.

**A**

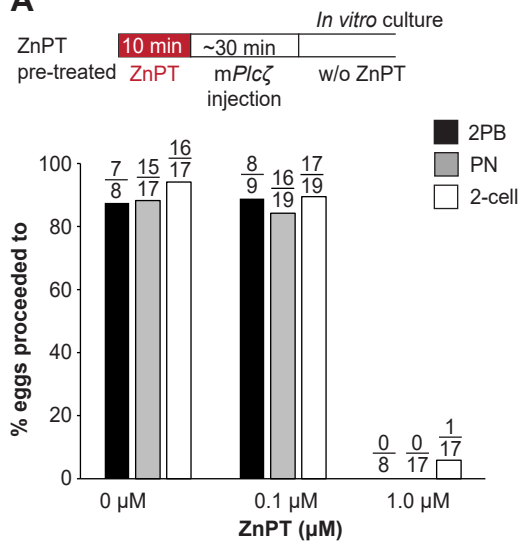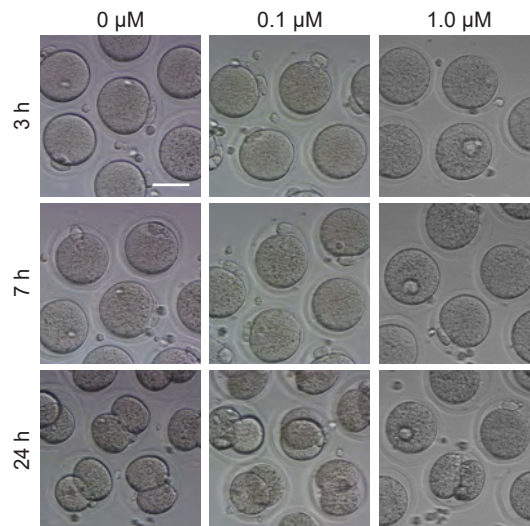

**B**

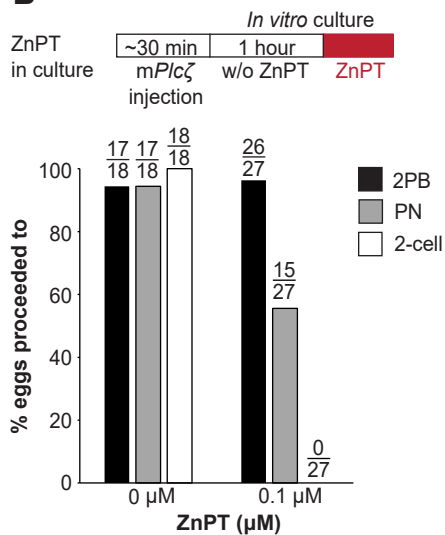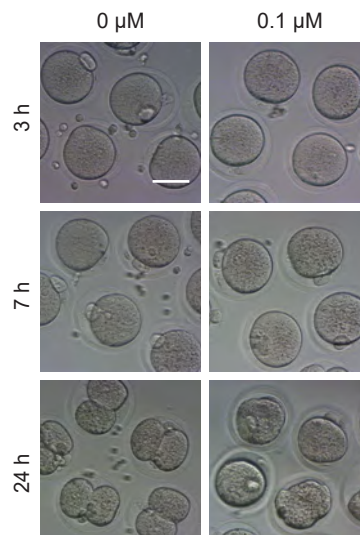

Supplement: NIHPP2023.04.13.536745V4-supplement-1.pdf [file NIHPP2023.04.13.536745V4-supplement-1.pdf]
